# Supplementary material for: Interlayer Structure of Bioactive Molecule, 2‐Aminoethanesulfonate, Intercalated into Calcium‐Containing Layered Double Hydroxides
Source: Hindawi journal article supplement (doi:10.1155/2012/987938), 2012-01-01
Supplement: f2 [file 987938.f2.pdf]

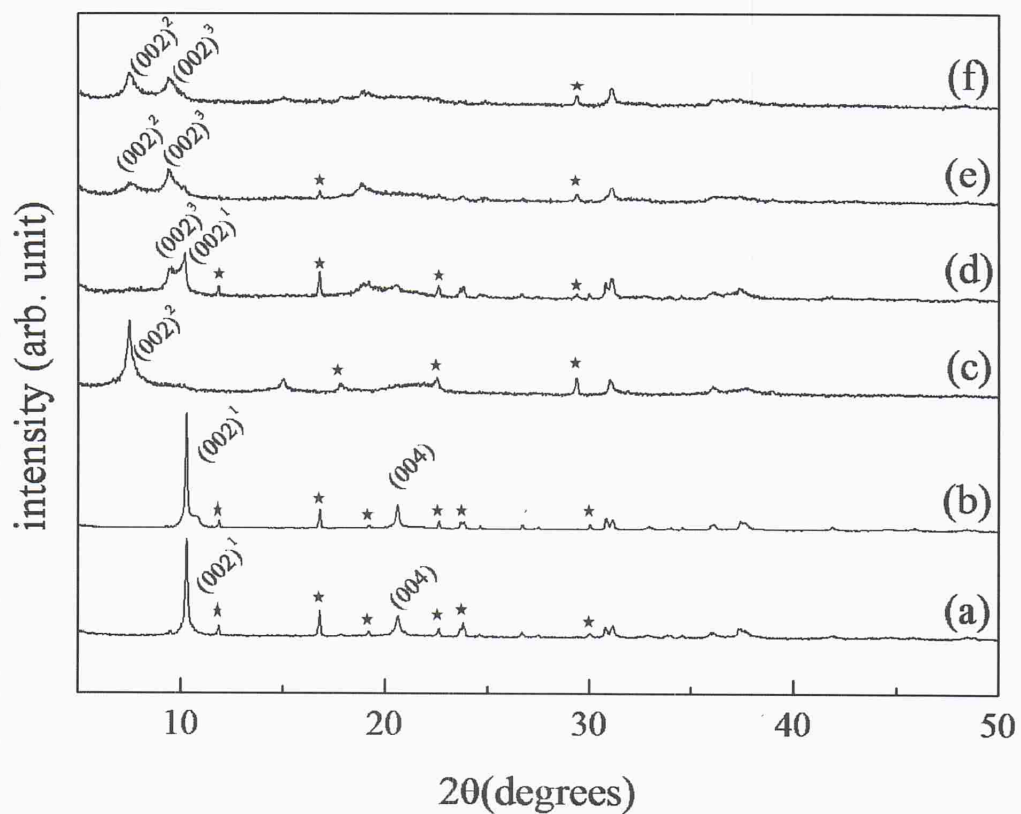

Fig. S2. X-ray diffraction patterns for CaAl-LDHs reacted with Na<sup>+</sup>-taurine salt via solid phase intercalation with respect to the amount of added water (a) 0 (b) 5 (c) 10 (d) 20 (e) 30 and (f) 40 μL. (★: Na<sup>+</sup>-taurine salt)

(002)<sup>1</sup>: (002) for NO<sub>3</sub><sup>-</sup> intercalated CaAl-LDH (Ca<sub>2.04</sub>Al(OH)<sub>6</sub>(NO<sub>3</sub>)·5.25H<sub>2</sub>O)

(002)<sup>2</sup>: (002) for taurine intercalated CaAl-LDH (Ca<sub>1.99</sub>Al(OH)<sub>6.01</sub>(Tau)<sub>0.97</sub>·5H<sub>2</sub>O)

(002)<sup>3</sup>: (002) for CaAl-LDH with slightly expanded gallery space. (between NO<sub>3</sub><sup>-</sup> intercalated phase and taurine intercalated phase)
