# Supplementary material for: Interlayer Structure of Bioactive Molecule, 2‐Aminoethanesulfonate, Intercalated into Calcium‐Containing Layered Double Hydroxides
Source: Hindawi journal article supplement (doi:10.1155/2012/987938), 2012-01-01
Supplement: f3 [file 987938.f3.pdf]

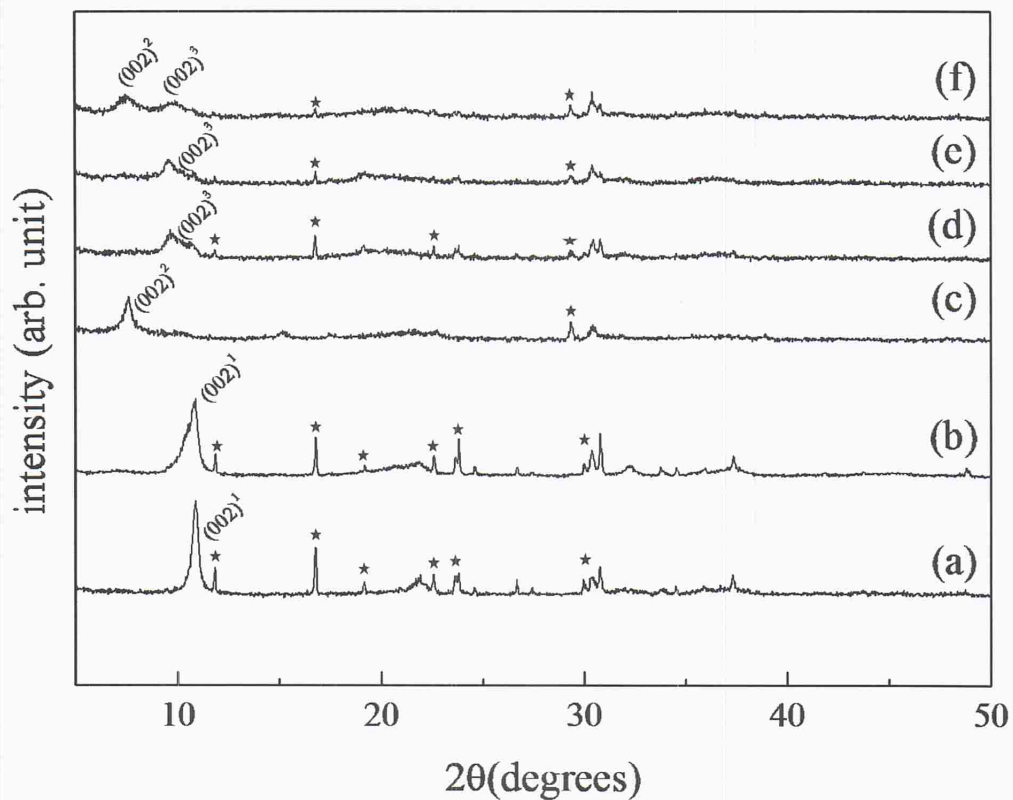

Fig. S3. X-ray diffraction patterns for CaFe-LDHs reacted with  $\text{Na}^+$ -taurine salt via solid phase intercalation with respect to the amount of added water (a) 0 (b) 5 (c) 10 (d) 20 (e) 30 and (f) 40  $\mu\text{L}$ . (★:  $\text{Na}^+$ -taurine salt)

$(002)^1$ : (002) for  $\text{NO}_3^-$  intercalated CaFe-LDH ( $\text{Ca}_{2.01}\text{Fe}(\text{OH})_6(\text{NO}_3)\cdot 4.75\text{H}_2\text{O}$ )

$(002)^2$ : (002) for taurine intercalated CaFe-LDH ( $\text{Ca}_{1.91}\text{Fe}(\text{OH})_{5.63}(\text{Tau})_{1.19}\cdot 5\text{H}_2\text{O}$ )

$(002)^3$ : (002) for CaFe-LDH with slightly expanded gallery space. (between  $\text{NO}_3^-$  intercalated phase and taurine intercalated phase)
